# Supplementary material for: Vaccination of Icelandic Children with the 10-Valent Pneumococcal Vaccine Leads to a Significant Herd Effect among Adults in Iceland
Source: PubMed Central journal article supplement (PMC6440763; doi:10.1128/jcm.01766-18), 2019-03-28
Supplement: JCM.01766-18-s0001.pdf [file JCM.01766-18-s0001.pdf]

**Table S1.** Number of adults within the uptake area, in all of Iceland and coverage according to each age group PreVac (2009-2011), PostVac-I (2012-2014) and PostVac-II (2015-2017).

| <b>Study period</b> | <b>Age group</b> | <b>Adults in uptake area</b> | <b>Adults in Iceland</b> | <b>Proportion of the Icelandic population</b> |
|---------------------|------------------|------------------------------|--------------------------|-----------------------------------------------|
| PreVac              | 18-64 years      | 143,507                      | 199,718                  | 72%                                           |
|                     | ≥65 years        | 26,535                       | 38,138                   | 70%                                           |
|                     | ≥18 years        | 170,042                      | 237,856                  | 72%                                           |
| PostVac-I           | 18-64 years      | 148,326                      | 199,544                  | 74%                                           |
|                     | ≥65 years        | 29,164                       | 39,188                   | 74%                                           |
|                     | ≥18 years        | 177,490                      | 238,732                  | 74%                                           |
| PostVac-II          | 18-64 years      | 154,313                      | 199,948                  | 77%                                           |
|                     | ≥65 years        | 32,411                       | 40,391                   | 80%                                           |
|                     | ≥18 years        | 186,724                      | 240,339                  | 78%                                           |
