# Supplementary material for: Vaccination of Icelandic Children with the 10-Valent Pneumococcal Vaccine Leads to a Significant Herd Effect among Adults in Iceland
Source: PubMed Central journal article supplement (PMC6440763; doi:10.1128/jcm.01766-18), 2019-03-28
Supplement: JCM.01766-18-s0002.pdf [file JCM.01766-18-s0002.pdf]

**Table S2.** Non-susceptibility to standard antimicrobials in the PreVac (2009-2011) and PostVac-II (2015-2017) periods in lower respiratory tract (LRT) samples.

| LRT<br>Non-susceptibility to  | PreVac     |      | PostVac-II |      | p-value          |
|-------------------------------|------------|------|------------|------|------------------|
|                               | n          | %    | n          | %    |                  |
| Penicillin                    | 116        | 36.9 | 70         | 30.4 | 0.121            |
| Erythromycin                  | 118        | 37.6 | 77         | 33.5 | 0.366            |
| Chloramphenicol               | 5          | 1.6  | 5          | 2.2  | 0.750            |
| Tetracycline                  | 109        | 34.7 | 62         | 27.0 | 0.062            |
| Clindamycin                   | 102        | 32.5 | 56         | 24.3 | <b>0.045</b>     |
| Trimethoprim-sulfamethoxazole | 134        | 42.7 | 49         | 21.3 | <b>&lt;0.001</b> |
| <b>Total LRT isolates</b>     | <b>314</b> |      | <b>230</b> |      |                  |
