# Supplementary material for: Vaccination of Icelandic Children with the 10-Valent Pneumococcal Vaccine Leads to a Significant Herd Effect among Adults in Iceland
Source: PubMed Central journal article supplement (PMC6440763; doi:10.1128/jcm.01766-18), 2019-03-28
Supplement: JCM.01766-18-s0003.pdf [file JCM.01766-18-s0003.pdf]

**Table S3.** Serotypes, CCs and STs detected PreVac (2009-2011) and PostVac-I (2012-2014) in LRT samples. Arranged according to the most prevalent serotype, CC and ST detected PreVac.

| LRT samples PreVac (2009-2011) |                                                   |                                                                                                                                                                                                                                                                                                                                                                    | LRT samples PostVac-I (2012-2014) |                                                        |                                                                                                                                                                                                                                                                                                                                       |
|--------------------------------|---------------------------------------------------|--------------------------------------------------------------------------------------------------------------------------------------------------------------------------------------------------------------------------------------------------------------------------------------------------------------------------------------------------------------------|-----------------------------------|--------------------------------------------------------|---------------------------------------------------------------------------------------------------------------------------------------------------------------------------------------------------------------------------------------------------------------------------------------------------------------------------------------|
| Serotype (n)                   | CC (n)                                            | ST (n: PMEN <sup>a</sup> )                                                                                                                                                                                                                                                                                                                                         | Serotype (n)                      | CC (n)                                                 | ST (n: PMEN)                                                                                                                                                                                                                                                                                                                          |
| 19F (54)                       | 236/271/320 (49)<br>395 (3)<br>199 (1)<br>177 (1) | 3014 (24: DLV <sup>b</sup> Taiwan <sup>19F</sup> -14), 271 (8: DLV Taiwan <sup>19F</sup> -14)<br>9165 (7: DLV Taiwan <sup>19F</sup> -14), 1968 (6: DLV Taiwan <sup>19F</sup> -14)<br>10369 (2: DLV Taiwan <sup>19F</sup> -14), 10376 (1), 13101 (1)<br>425 (3)<br>199 (1: Netherlands <sup>15B</sup> -37)<br>179 (1: SLV <sup>e</sup> Portugal <sup>19F</sup> -21) | 19F (31)                          | 236/271/320 <sup>c</sup> (29)<br>15 (1)<br>156/162 (1) | 3014 <sup>d</sup> (12: DLV Taiwan <sup>19F</sup> -14), 9165 (8: DLV Taiwan <sup>19F</sup> -14)<br>271 (3: SLV Taiwan <sup>19F</sup> -14), 1968 (3: DLV Taiwan <sup>19F</sup> -14)<br>9458 (1: DLV Taiwan <sup>19F</sup> -14)<br>9828 (1), 10390 (1: DLV Taiwan <sup>19F</sup> -14)<br>3016 (1)<br>162 (1: SLV Spain <sup>9V</sup> -3) |
| 23F (12)                       | 439 (8)<br>392 (2), 199 (1)<br>361 (1)            | 311 (6: DLV Tennessee <sup>23F</sup> -4), 10348 (1: DLV Tennessee <sup>23F</sup> -4),<br>10347 (1)<br>440 (2), 199 (1: Netherlands <sup>15B</sup> -37)<br>277 (1)                                                                                                                                                                                                  | 23F (7)                           | 439 (4)<br>392 (3)                                     | 311 (3: DLV Tennessee <sup>23F</sup> -4)<br>42 (1: DLV Tennessee <sup>23F</sup> -4)<br>440 (3)                                                                                                                                                                                                                                        |
| 6A (12)                        | 490 (6), 460 (2)<br>15 (2), 395 (2)               | 2221 (6), 460 (2)<br>3981 (2), 395 (2: SLV Portugal <sup>6A</sup> -41)                                                                                                                                                                                                                                                                                             | 6A (6)                            | 490 (3), 15 (1), 460 (1)<br>9789 (1)                   | 2221 (3), 3981 (1), 460 (1)<br>2756 (1)                                                                                                                                                                                                                                                                                               |
| 3 (10)                         | 180 (8)<br>260 (1), 378 (1)                       | 180 (6: Netherlands <sup>3</sup> -31), 13100 (1: SLV Netherlands <sup>3</sup> -31)<br>505 (1: DLV Netherlands <sup>3</sup> -31), 13100 (1)<br>260 (1), 1377 (1)                                                                                                                                                                                                    | 3 (13)                            | 180 (13)                                               | 180 (13: Netherlands <sup>3</sup> -31)                                                                                                                                                                                                                                                                                                |
| 6B (10)                        | 138/176 (5)<br>90 (4), 146 (1)                    | 176 (3: DLV Poland <sup>23F</sup> -16), 138 (2)<br>90 (4: Spain <sup>6B</sup> -2), 146 (1)                                                                                                                                                                                                                                                                         | 6B (11)                           | 138/176 (6)<br>90 (4), 171 (1)                         | 38 (3), 176 (3: DLV Poland <sup>23F</sup> -16)<br>90 (4: Spain <sup>6B</sup> -2), 1639 (1)                                                                                                                                                                                                                                            |
| 22F (8)                        | 433 (8)                                           | 433 (8)                                                                                                                                                                                                                                                                                                                                                            | 22F (3)                           | 433 <sup>f</sup> (2), 1294/4522 (1)                    | 433 <sup>f</sup> (2), 1294 (1)                                                                                                                                                                                                                                                                                                        |
| 11A (6)                        | 62 (6)                                            | 62 (6: DLV Netherlands <sup>8</sup> -33)                                                                                                                                                                                                                                                                                                                           | 11A (5)                           | 62 (5)                                                 | 62 (4: DLV Netherlands <sup>8</sup> -33), 13130 (1)                                                                                                                                                                                                                                                                                   |
| 19A (6)                        | 199 (5)<br>3017 (1)                               | 199 (3: Netherlands <sup>15B</sup> -37), 667 (1: SLV Netherlands <sup>15B</sup> -37)<br>10360 (1: DLV Netherlands <sup>15B</sup> -37)<br>3017 (1)                                                                                                                                                                                                                  | 19A (4)                           | 3017 (2)<br>199 (1)<br>Sing <sup>g</sup> 1801 (1)      | 3017 (2)<br>199 (1: Netherlands <sup>15B</sup> -37)<br>1801 (1)                                                                                                                                                                                                                                                                       |
| 14 (4)                         | 124 (3)<br>15 (1)                                 | 124 (2: Netherlands <sup>14</sup> -35), 1975 (1: SLV Netherlands <sup>14</sup> -35)<br>9 (1: England <sup>14</sup> -9)                                                                                                                                                                                                                                             | 14 (3)                            | 124 (3)                                                | 124 (3: Netherlands <sup>14</sup> -35)                                                                                                                                                                                                                                                                                                |
| 35B (5)                        | 1816 (4), 452 (1)                                 | 1967 (3), 10361 (1), 452 (1)                                                                                                                                                                                                                                                                                                                                       | 35B (2)                           | 198 (1), 1816 (1)                                      | 4346 (1), 10361 (1)                                                                                                                                                                                                                                                                                                                   |
| 9V (4)                         | 156/162 (4)                                       | 156 (2: Spain <sup>9V</sup> -3), 162 (1: SLV Spain <sup>9V</sup> -3), 1269 (1: DLV Spain <sup>9V</sup> -3)                                                                                                                                                                                                                                                         | 9V (2)                            | 156/162 (2)                                            | 162 (2: SLV Spain <sup>9V</sup> -3)                                                                                                                                                                                                                                                                                                   |
| 15B/C (4)                      | 199 (2), 1262 (2)                                 | 199 (2: Netherlands <sup>15B</sup> -37), 1262 (2)                                                                                                                                                                                                                                                                                                                  | 15B/C (6)                         | 1262 (5), 199 (1)                                      | 1262 (5), 199 (1: Netherlands <sup>15B</sup> -37)                                                                                                                                                                                                                                                                                     |
| 23B (3)                        | 439 (3)                                           | 439 (3: SLV Tennessee <sup>23F</sup> -4)                                                                                                                                                                                                                                                                                                                           | 23B (3)                           | 439 (2), 338 (1)                                       | 439 (2: SLV Tennessee <sup>23F</sup> -4), 1349 (1: DLV Colombia <sup>23F</sup> -26)                                                                                                                                                                                                                                                   |
| 23A (3)                        | 439 (3)                                           | 436 (2: DLV Tennessee <sup>23F</sup> -4), 42 (1: DLV Tennessee <sup>23F</sup> -4)                                                                                                                                                                                                                                                                                  | 23A (1)                           | 439 (1)                                                | 42 (1: DLV Tennessee <sup>23F</sup> -4)                                                                                                                                                                                                                                                                                               |
| 16F (3)                        | 30 (3)                                            | 30 (2), 2042 (1)                                                                                                                                                                                                                                                                                                                                                   | 16F (1)                           | 30 (1)                                                 | 30 (1)                                                                                                                                                                                                                                                                                                                                |
| 33F (2)                        | 100 (2)                                           | 100 (2)                                                                                                                                                                                                                                                                                                                                                            | 33F (2)                           | 100 (2)                                                | 100 (2)                                                                                                                                                                                                                                                                                                                               |
| 9A (2)                         | 156/162 (2)                                       | 156 (1: Spain <sup>9V</sup> -3), 1269 (1: DLV Spain <sup>9V</sup> -3)                                                                                                                                                                                                                                                                                              | 9A (1)                            | 156/162 (1)                                            | 156 (1: Spain <sup>9V</sup> -3)                                                                                                                                                                                                                                                                                                       |
| 8 (1)                          | 62 (1)                                            | 53 (1: Netherlands <sup>8</sup> -33)                                                                                                                                                                                                                                                                                                                               | 8 (0)                             |                                                        |                                                                                                                                                                                                                                                                                                                                       |
| 21 (1)                         | 193 (1)                                           | 1877 (1: DLV Greece <sup>21</sup> -30)                                                                                                                                                                                                                                                                                                                             | 21 (2)                            | 193 (2)                                                | 1877 (2: DLV Greece <sup>21</sup> -30)                                                                                                                                                                                                                                                                                                |
| 31 (1)                         | 113 (1)                                           | 1766 (1)                                                                                                                                                                                                                                                                                                                                                           | 31 (0)                            |                                                        |                                                                                                                                                                                                                                                                                                                                       |
| 34 (1)                         | 4878 (1)                                          | 10357 (1)                                                                                                                                                                                                                                                                                                                                                          | 34 (0)                            |                                                        |                                                                                                                                                                                                                                                                                                                                       |
| 18B (1)                        | 113 (1)                                           | 110 (1: SLV Netherlands <sup>18C</sup> -36)                                                                                                                                                                                                                                                                                                                        | 18B (0)                           |                                                        |                                                                                                                                                                                                                                                                                                                                       |
| 18C (1)                        | 113 (1)                                           | 116 (1: SLV Netherlands <sup>18C</sup> -36)                                                                                                                                                                                                                                                                                                                        | 18C (0)                           |                                                        |                                                                                                                                                                                                                                                                                                                                       |
| 35F (1)                        | 460 (1)                                           | 1635 (1)                                                                                                                                                                                                                                                                                                                                                           | 35F (4)                           | 460 (4)                                                | 1635 (4)                                                                                                                                                                                                                                                                                                                              |
| 6C (1)                         | 315 (1)                                           | 386 (1: DLV Poland <sup>6B</sup> -20)                                                                                                                                                                                                                                                                                                                              | 6C (1)                            | 315 (1)                                                | 386 (1: DLV Poland <sup>6B</sup> -20)                                                                                                                                                                                                                                                                                                 |

|                       |         |                                |          |                    |                                                                                                             |
|-----------------------|---------|--------------------------------|----------|--------------------|-------------------------------------------------------------------------------------------------------------|
| 15A (0)               |         |                                | 15A (3)  | 193 (2), 3058 (1)  | 410 (2: SLV Greece <sup>21</sup> -30), 4965 (1)                                                             |
| 9N (0)                |         |                                | 9N (2)   | 66 (2)             | 66 (1: SLV Tennessee <sup>14</sup> -18), 10344 (1: DLV Tennessee <sup>14</sup> -18)                         |
| 7F (0)                |         |                                | 7F (1)   | 191 (1)            | 191 (1: Netherlands <sup>7F</sup> -39)                                                                      |
| NESp <sup>h</sup> (1) | 448 (1) | 448 (1: USA <sup>NT</sup> -43) | NESp (4) | 344 (3)<br>448 (1) | 344 (2: Norway <sup>NT</sup> -42), 10371 (1:SLV Norway <sup>NT</sup> -42)<br>448 (1: USA <sup>NT</sup> -43) |

<sup>a</sup>PMEN: Pneumococcal molecular epidemiology network clone. <sup>b</sup>DLV: Double locus variant. <sup>c</sup>P-value=0.001, <sup>d</sup>P-value=0.030, <sup>e</sup>SLV: Single locus variant. <sup>f</sup>P-value=0.040. <sup>g</sup>Sing: Singleton.

<sup>h</sup>NESp: Non-encapsulated *S. pneumoniae*.
